# Supplementary material
Source: publisher figshare collection journal article supplement (https://acs.figshare.com/ndownloader/files/3708766)
Supplement: Supplementary file 1 [file 3708766]

1    **Supporting Information for**

2    **Modeling the effect of external carbon source addition under different electron acceptor**  
3    **conditions in biological nutrient removal activated sludge systems**

4    Xiang Hu<sup>1</sup>, Kamil Wisniewski<sup>2\*</sup>, Krzysztof Czerwionka<sup>2</sup>, Qi Zhou<sup>1</sup>, Li Xie<sup>1</sup>, and Jacek  
5    Makinia<sup>2</sup>

6    <sup>1</sup>State Key Laboratory of Pollution Control and Resources Reuse, Tongji University, 1239  
7    Siping Road, Shanghai 200092, China

8    <sup>2</sup>Faculty of Civil and Environmental Engineering, Gdansk University of Technology, ul.  
9    Narutowicza 11/12, 80-233 Gdansk, Poland

10    **\*Corresponding author:**

11    Kamil Wisniewski

12    Department of Civil Engineering, Gdansk University of Technology

13    Narutowicza Street 11/12, 80-233 Gdansk, Poland

14    Telephone: +48 58 347-23-03;

15    E-mail: [kamwisni@pg.gda.pl](mailto:kamwisni@pg.gda.pl)

16    This Supporting Information contains 18-page document, seven tables, two figures, including  
17    this cover page. This material is available free of charge via the Internet at <http://pubs.acs.org>.

## 18      **Model limitations**

19      Even though, the developed model is complex, there are still a few important issues that  
20      may be incorporated in further expansions or modifications:

21      (1) The competition between PAOs and GAOs was ignored due to a negligible activity of  
22      the GAOs (confirmed experimentally). However, in the EBPR systems with a substantial  
23      competition between PAOs and GAOs, the metabolism of GAOs cannot be ignored.

24      (2) When abundant in municipal wastewater, propionate may be incorporated in a model  
25      as a separate state variable in order to describe better the response of PAOs to different  
26      carbon sources (acetate and propionate) and the competition between PAOs and GAOs.

27      (3) Since the nitrite effect on PAOs has not ultimately been clarified, the actual inhibitory  
28      effect of nitrite or FNA in BNR systems requires further investigation.

29      (4) Two-step denitrification is considered. The growing concern of greenhouse gas  
30      (GHG) emissions from WWTPs may require further extensions by including four steps  
31      ( $\text{NO}_3 \rightarrow \text{NO}_2 \rightarrow \text{NO} \rightarrow \text{N}_2\text{O} \rightarrow \text{N}_2$ ).

## 32      **Organization of the modeling study procedure**

33      The modelling study followed the consecutive steps presented in SI Figure S1. First (step  
34      1), the original ASM2d was calibrated/validated under dynamic conditions with results of  
35      both batch tests with the settled wastewater (without the addition of external carbon) and 96-  
36      hour measurement campaign in the full-scale MUCT bioreactor.<sup>28</sup> Next, sensitivity analysis  
37      using a one-variable-at-a-time approach was performed to establish number of parameters  
38      that indeed influence the model outputs (step 2). Considering the most influential  
39      parameters, the expanded model was calibrated (step 3) based on experimental data of the  
40      selected two-phase batch tests carried out under anaerobic/aerobic and anaerobic/anoxic

41 conditions with acetate ( $S_A$ ) and ethanol ( $S_{A,1}$ ) as two different types of external carbon  
42 sources. For model calibration, a special GPS-X utility called “Optimizer” was used.  
43 Parameters were estimated based on the Nelder-Mead simplex method with the maximum  
44 likelihood as an objective function. The 95% confidence intervals for the estimated  
45 parameters were calculated from the parameter estimation error covariance matrix.  
46 Furthermore, a correlation matrix was developed in step 4 for each calibration step to  
47 evaluate the degree of correlation between pairs of the adjusted parameters and determine if a  
48 change in the value of one parameter could be compensated by a change in the value of  
49 another parameter (to avoid potential overparametrization). The details on the computational  
50 methods can be found in the GPS-X “Technical Reference” (Hydromantis, Canada ). The  
51 expanded model was validated based on results of the remaining one- and two-phase batch  
52 experiments (step 5). In order to evaluate the goodness of fit between observed data and  
53 model predictions, the absolute and relative standard errors as well as correlation coefficients  
54 of determination ( $R^2$ ) were determined for each measured variable.

55 Finally (step 6), the long-term acclimation experiment with addition of the  $S_{A,1}$  type of  
56 external carbon source (fusel oil) to the anoxic zone of a bench-scale pilot system was  
57 simulated with the expanded ASM2d.

58 The biomass composition for setting the initial conditions was determined based on steady-  
59 state and dynamic simulations of the full-scale activated sludge system at the studied plant.  
60 This procedure was described by Swinarski et al.<sup>28</sup> Specifically, the original ASM2d model  
61 was first calibrated/validated under steady-state and dynamic simulations in the full-scale  
62 plant to determine each soluble and particulate fraction in the biomass. Then the initial  
63 biomass concentrations in each batch experiment were calculated based on the ratio of  
64 MLVSS concentration in the batch reactor and the MLVSS concentration in the sampling  
65 point at the full-scale plant.

## 66    **Parameter estimation, confidence intervals and correlation matrix**

67    The nominal range sensitivity analysis using a one-variable-at-a-time approach was  
68    performed to establish number of parameters that indeed influence the model outputs (Table  
69    S3 in SI).<sup>14</sup> Based on those results, 13 sensitive parameters were identified in the expanded  
70    ASM2d model, excluding the parameters which were directly adopted from the study of  
71    Swinarski et al.<sup>28</sup>

72    Parameter estimation was performed based on data derived from the selected batch  
73    experiments, including two-phase tests with the different external carbon sources (acetate,  
74    ethanol) and electron acceptors (DO, NO<sub>2</sub>-N, NO<sub>3</sub>-N). Results of parameter estimation are  
75    shown in SI Table S5 along with uncertainty of the parameter estimates, quantified as the  
76    95% confidence intervals. Several new parameters revealed relatively large confidence  
77    intervals, which implied rather poor parameter estimation in those cases e.g.  $K_{IOPHA} =$   
78     $3.60 \pm 1.135$  or  $K_{IPHA} = 0.02 \pm 0.138$ . Therefore, a correlation matrix between the new  
79    estimated parameters was developed and analyzed in order to explain the large confidence  
80    intervals. Correlations between the parameters estimated in step 3.1 and steps 3.2-3.4 are  
81    shown in SI Table S6 and Table S7, respectively.

82    Strong correlations (values close to 1) were found between the parameters  $K_{IPHA}$  and  $K_{MAX1}$   
83    (0.98), and the parameters  $Y_{H1}$  and  $\mu_{H1}$  (0.96) in step 3.1 and 3.2, respectively. The strong  
84    correlation implied that a change in the value of one parameter could be compensated by a  
85    change in the value of another parameter. This could make it difficult to find unique estimates  
86    for those new parameters. Nevertheless, all optimization runs using different initial parameter  
87    estimates converged to the same optimal parameter set. The low standards errors listed in SI  
88    Table S4 and high coefficients of determination  $R^2$  (the average value of approximately 0.92)  
89    confirmed the goodness of fit with respect to the estimated parameters for each batch  
90    experiment.

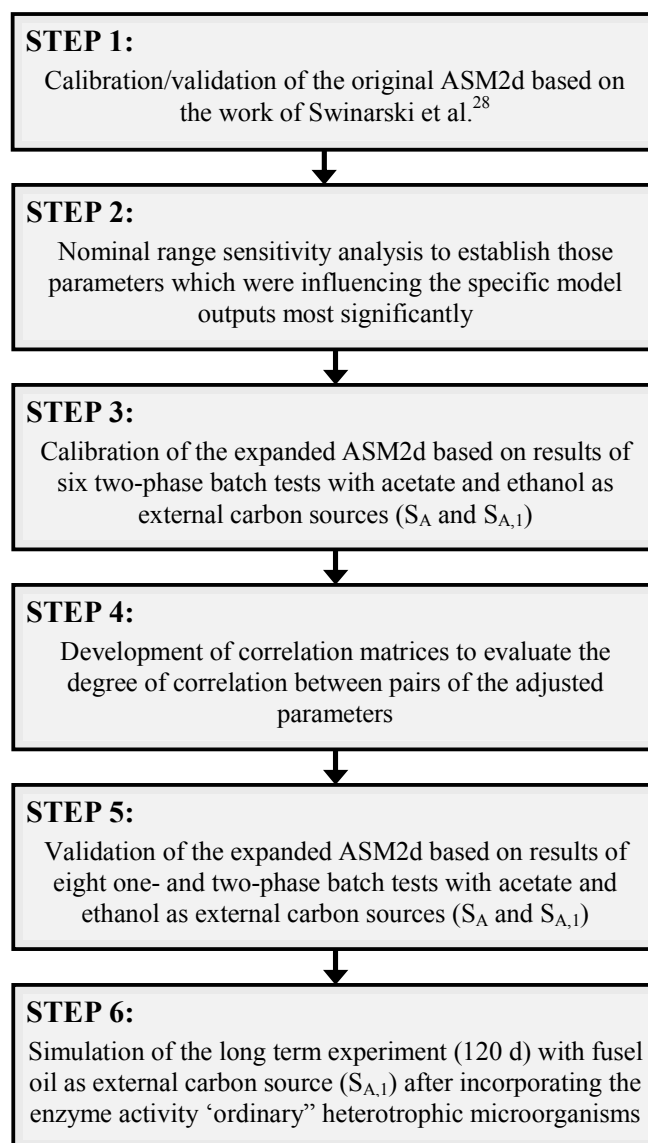

91

92 **Figure S1.** Calibration/validation procedure of the expanded ASM2d for predicting the  
93 effects of external carbon sources in BNR activated sludge systems.

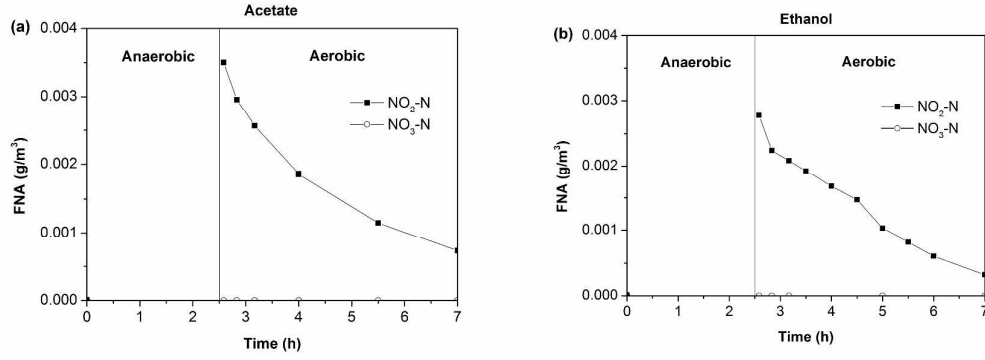

**Figure S2.** FNA concentrations measured in two-phase anaerobic-anoxic experiments with different external carbon sources and different electron acceptors: (a) acetate,  $\text{NO}_3\text{-N}$  and  $\text{NO}_2\text{-N}$ , (b) ethanol,  $\text{NO}_3\text{-N}$  and  $\text{NO}_2\text{-N}$ .

**Table S1.** Stoichiometric matrix for the expanded ASM2d (only new and modified processes)

| Component<br>Process                                                              |                                                           | 1<br>$S_O$             | 2<br>$S_F$       | 3<br>$S_A$       | 4<br>$S_{A1}$       | 5<br>$S_{NH4}$ | 6<br>$S_{NO2}$                    | 7<br>$S_{NO3}$                    | 8<br>$S_{PO4}$ | 9<br>$S_I$ | 10<br>$S_{ALK}$ |
|-----------------------------------------------------------------------------------|-----------------------------------------------------------|------------------------|------------------|------------------|---------------------|----------------|-----------------------------------|-----------------------------------|----------------|------------|-----------------|
| <b>Growth of heterotrophic organisms (<math>X_H</math>)</b>                       |                                                           |                        |                  |                  |                     |                |                                   |                                   |                |            |                 |
| 1                                                                                 | Aerobic growth of $X_H$ on $S_{A,1}$                      | $1 - \frac{1}{Y_{H1}}$ |                  |                  | $-\frac{1}{Y_{H1}}$ | $v_{1,NH4}$    |                                   |                                   | $v_{1,PO4}$    |            |                 |
| 2                                                                                 | Anoxic growth on $S_F$ , denitrification ( $S_{NO2}$ )    |                        | $-\frac{1}{Y_H}$ |                  |                     | $v_{2,NH4}$    | $-\frac{1 - Y_H}{1.71 Y_H}$       |                                   | $v_{2,PO4}$    |            |                 |
| 3                                                                                 | Anoxic growth on $S_F$ , denitrification ( $S_{NO3}$ )    |                        | $-\frac{1}{Y_H}$ |                  |                     | $v_{3,NH4}$    |                                   | $-\frac{1 - Y_H}{2.86 Y_H}$       | $v_{3,PO4}$    |            |                 |
| 4                                                                                 | Anoxic growth on $S_A$ , denitrification ( $S_{NO2}$ )    |                        |                  | $-\frac{1}{Y_H}$ |                     | $v_{4,NH4}$    | $-\frac{1 - Y_H}{1.71 Y_H}$       |                                   | $v_{4,PO4}$    |            |                 |
| 5                                                                                 | Anoxic growth on $S_A$ , denitrification ( $S_{NO3}$ )    |                        |                  | $-\frac{1}{Y_H}$ |                     | $v_{5,NH4}$    |                                   | $-\frac{1 - Y_H}{2.86 Y_H}$       | $v_{5,PO4}$    |            |                 |
| 6                                                                                 | Anoxic growth on $S_{A1}$ , denitrification ( $S_{NO2}$ ) |                        |                  |                  | $-\frac{1}{Y_{H1}}$ | $v_{6,NH4}$    | $-\frac{1 - Y_{H1}}{1.71 Y_{H1}}$ |                                   | $v_{6,PO4}$    |            |                 |
| 7                                                                                 | Anoxic growth on $S_{A1}$ , denitrification ( $S_{NO3}$ ) |                        |                  |                  | $-\frac{1}{Y_{H1}}$ | $v_{7,NH4}$    |                                   | $-\frac{1 - Y_{H1}}{2.86 Y_{H1}}$ | $v_{7,PO4}$    |            |                 |
| <b>Activity of Phosphorus Accumulating Organisms (PAO) (<math>X_{PAO}</math>)</b> |                                                           |                        |                  |                  |                     |                |                                   |                                   |                |            |                 |
| 8                                                                                 | Storage of $X_{PHA}$ by PAOs                              |                        |                  | -1               |                     |                |                                   |                                   | $Y_{PO4}$      |            |                 |

| Component<br>Process |                                                                         | 1<br>$S_O$ | 2<br>$S_F$ | 3<br>$S_A$             | 4<br>$S_{A1}$          | 5<br>$S_{NH4}$ | 6<br>$S_{NO2}$ | 7<br>$S_{NO3}$ | 8<br>$S_{PO4}$ | 9<br>$S_I$ | 10<br>$S_{ALK}$ |
|----------------------|-------------------------------------------------------------------------|------------|------------|------------------------|------------------------|----------------|----------------|----------------|----------------|------------|-----------------|
| 9                    | Aerobic storage of $X_{pp}$ by PAOs on $X_{PHA}$                        | $-Y_{PHA}$ |            |                        |                        |                |                |                | -1             |            |                 |
| 10                   | Anoxic storage of $X_{pp}$ , denitrification ( $S_{NO2}$ )              |            |            |                        |                        |                | $v_{10,NO2}$   |                | -1             |            |                 |
| 11                   | Anoxic storage of $X_{pp}$ , denitrification ( $S_{NO3}$ )              |            |            |                        |                        |                |                | $v_{11,NO3}$   | -1             |            |                 |
| 12                   | Aerobic storage of $X_{pp}$ by PAO on $S_A$                             | $-Y_{SA}$  |            | $-Y_{SA}$              |                        |                |                |                | -1             |            |                 |
| 13                   | Anoxic storage of $X_{pp}$ on $S_A$ , denitrification ( $S_{NO2}$ )     |            |            | $-Y_{SA}$              |                        |                | $v_{13,NO2}$   |                | -1             |            |                 |
| 14                   | Anoxic storage of $X_{pp}$ on $S_A$ , denitrification ( $S_{NO3}$ )     |            |            | $-Y_{SA}$              |                        |                |                | $v_{14,NO3}$   | -1             |            |                 |
| 15                   | Aerobic storage of $X_{pp}$ by PAO on $S_{A,1}$                         | $-Y_{SA1}$ |            |                        | $-Y_{SA1}$             |                |                |                | -1             |            |                 |
| 16                   | Anoxic storage of $X_{pp}$ on $S_{A,1}$ , denitrification ( $S_{NO2}$ ) |            |            |                        | $-Y_{SA1}$             |                | $v_{16,NO2}$   |                | -1             |            |                 |
| 17                   | Anoxic storage of $X_{pp}$ on $S_{A,1}$ , denitrification ( $S_{NO3}$ ) |            |            |                        | $-Y_{SA1}$             |                |                | $v_{17,NO3}$   | -1             |            |                 |
| 18                   | Aerobic growth of $X_{PAO}$ on $X_{PHA}$                                | $v_{18,O}$ |            |                        |                        | $v_{18,NH4}$   |                |                | $-i_{P,BM}$    |            |                 |
| 19                   | Anoxic growth of $X_{PAO}$ , denitrification ( $S_{NO2}$ )              |            |            |                        |                        | $v_{19,NH4}$   | $v_{19,NO2}$   |                | $-i_{P,BM}$    |            |                 |
| 20                   | Anoxic growth of $X_{PAO}$ , denitrification ( $S_{NO3}$ )              |            |            |                        |                        | $v_{20,NH4}$   |                | $v_{20,NO3}$   | $-i_{P,BM}$    |            |                 |
| 21                   | Aerobic growth of $X_{PAO}$ on $S_A$                                    | $v_{21,O}$ |            | $-\frac{1}{Y_{PAO,S}}$ |                        | $v_{21,NH4}$   |                |                | $-i_{P,BM}$    |            |                 |
| 22                   | Anoxic growth of $X_{PAO}$ on $S_A$ , denitrification ( $S_{NO2}$ )     |            |            | $-\frac{1}{Y_{PAO,S}}$ |                        | $v_{22,NH4}$   | $v_{22,NO2}$   |                | $-i_{P,BM}$    |            |                 |
| 23                   | Anoxic growth of $X_{PAO}$ on $S_A$ , denitrification ( $S_{NO3}$ )     |            |            | $-\frac{1}{Y_{PAO,S}}$ |                        | $v_{23,NH4}$   |                | $v_{23,NO3}$   | $-i_{P,BM}$    |            |                 |
| 24                   | Aerobic growth of $X_{PAO}$ on $S_{A,1}$                                | $v_{24,O}$ |            |                        | $-\frac{1}{Y_{PAO,S}}$ | $v_{24,NH4}$   |                |                | $-i_{P,BM}$    |            |                 |
| 25                   | Anoxic growth of $X_{PAO}$ on $S_{A,1}$ , denitrification ( $S_{NO2}$ ) |            |            |                        | $-\frac{1}{Y_{PAO,S}}$ | $v_{25,NH4}$   | $v_{25,NO2}$   |                | $-i_{P,BM}$    |            |                 |
| 26                   | Anoxic growth of $X_{PAO}$ on $S_{A,1}$ , denitrification ( $S_{NO3}$ ) |            |            |                        | $-\frac{1}{Y_{PAO,S}}$ | $v_{26,NH4}$   |                | $v_{26,NO3}$   | $-i_{P,BM}$    |            |                 |

| Component<br>Process                                                                                |                                                       | 1<br>$S_O$ | 2<br>$S_F$   | 3<br>$S_A$ | 4<br>$S_{A1}$ | 5<br>$S_{NH4}$ | 6<br>$S_{NO2}$ | 7<br>$S_{NO3}$ | 8<br>$S_{PO4}$ | 9<br>$S_I$ | 10<br>$S_{ALK}$ |
|-----------------------------------------------------------------------------------------------------|-------------------------------------------------------|------------|--------------|------------|---------------|----------------|----------------|----------------|----------------|------------|-----------------|
| <b>Hydrolysis processes</b>                                                                         |                                                       |            |              |            |               |                |                |                |                |            |                 |
| 27                                                                                                  | Anoxic hydrolysis of $X_S$ with nitrite ( $S_{NO2}$ ) |            | $1 - f_{SI}$ |            |               | $V_{27,NH4}$   |                |                | $V_{27,PO4}$   | $f_{SI}$   |                 |
| 28                                                                                                  | Anoxic hydrolysis of $X_S$ with nitrate ( $S_{NO3}$ ) |            | $1 - f_{SI}$ |            |               | $V_{28,NH4}$   |                |                | $V_{28,PO4}$   | $f_{SI}$   |                 |
| <b>Activity of the denitrification enzyme for the external carbon source (<math>S_{A,1}</math>)</b> |                                                       |            |              |            |               |                |                |                |                |            |                 |
| 29                                                                                                  | Enzyme synthesis                                      |            |              |            |               |                |                |                |                |            |                 |
| 30                                                                                                  | Enzyme decay                                          |            |              |            |               |                |                |                |                |            |                 |

100

101 **Table S1.** (continued) Stoichiometric matrix for the expanded ASM2d (only new and  
102 modified processes)

| Component<br>Process                                                              |                                                            | 11<br>$X_S$ | 12<br>$X_H$ | 13<br>$X_{PAO}$ | 14<br>$X_{PP}$ | 15<br>$X_{PHA}$ | 16<br>$E_{sat}$ |
|-----------------------------------------------------------------------------------|------------------------------------------------------------|-------------|-------------|-----------------|----------------|-----------------|-----------------|
| <b>Growth of heterotrophic organisms (<math>X_H</math>)</b>                       |                                                            |             |             |                 |                |                 |                 |
| 1                                                                                 | Aerobic growth of $X_H$ on $S_{A,1}$                       |             | 1           |                 |                |                 |                 |
| 2                                                                                 | Anoxic growth on $S_F$ , denitrification ( $S_{NO2}$ )     |             | 1           |                 |                |                 |                 |
| 3                                                                                 | Anoxic growth on $S_F$ , denitrification ( $S_{NO3}$ )     |             | 1           |                 |                |                 |                 |
| 4                                                                                 | Anoxic growth on $S_A$ , denitrification ( $S_{NO2}$ )     |             | 1           |                 |                |                 |                 |
| 5                                                                                 | Anoxic growth on $S_A$ , denitrification ( $S_{NO3}$ )     |             | 1           |                 |                |                 |                 |
| 6                                                                                 | Anoxic growth on $S_{A1}$ , denitrification ( $S_{NO2}$ )  |             | 1           |                 |                |                 |                 |
| 7                                                                                 | Anoxic growth on $S_{A1}$ , denitrification ( $S_{NO3}$ )  |             | 1           |                 |                |                 |                 |
| <b>Activity of Phosphorus Accumulating Organisms (PAO) (<math>X_{PAO}</math>)</b> |                                                            |             |             |                 |                |                 |                 |
| 8                                                                                 | Storage of $X_{PHA}$ by PAOs                               |             |             |                 | $-Y_{PO4}$     | 1               |                 |
| 9                                                                                 | Aerobic storage of $X_{pp}$ by PAOs on $X_{PHA}$           |             |             |                 | 1              | $-Y_{PHA}$      |                 |
| 10                                                                                | Anoxic storage of $X_{pp}$ , denitrification ( $S_{NO2}$ ) |             |             |                 | 1              | $-Y_{PHA}$      |                 |



| Process \ Component                                                                                 |                                                                         | 11<br>$X_S$ | 12<br>$X_H$ | 13<br>$X_{PAO}$ | 14<br>$X_{PP}$ | 15<br>$X_{PHA}$      | 16<br>$E_{sat}$ |
|-----------------------------------------------------------------------------------------------------|-------------------------------------------------------------------------|-------------|-------------|-----------------|----------------|----------------------|-----------------|
| 11                                                                                                  | Anoxic storage of $X_{pp}$ , denitrification ( $S_{NO3}$ )              |             |             |                 | 1              | $-Y_{PHA}$           |                 |
| 12                                                                                                  | Aerobic storage of $X_{pp}$ by PAO on $S_A$                             |             |             |                 | 1              |                      |                 |
| 13                                                                                                  | Anoxic storage of $X_{pp}$ on $S_A$ , denitrification ( $S_{NO2}$ )     |             |             |                 | 1              |                      |                 |
| 14                                                                                                  | Anoxic storage of $X_{pp}$ on $S_A$ , denitrification ( $S_{NO3}$ )     |             |             |                 | 1              |                      |                 |
| 15                                                                                                  | Aerobic storage of $X_{pp}$ by PAO on $S_{A,1}$                         |             |             |                 | 1              |                      |                 |
| 16                                                                                                  | Anoxic storage of $X_{pp}$ on $S_{A,1}$ , denitrification ( $S_{NO2}$ ) |             |             |                 | 1              |                      |                 |
| 17                                                                                                  | Anoxic storage of $X_{pp}$ on $S_{A,1}$ , denitrification ( $S_{NO3}$ ) |             |             |                 | 1              |                      |                 |
| 18                                                                                                  | Aerobic growth of $X_{PAO}$ on $X_{PHA}$                                |             |             | 1               |                | $-\frac{1}{Y_{PAO}}$ |                 |
| 19                                                                                                  | Anoxic growth of $X_{PAO}$ , denitrification ( $S_{NO2}$ )              |             |             | 1               |                | $-\frac{1}{Y_{PAO}}$ |                 |
| 20                                                                                                  | Anoxic growth of $X_{PAO}$ , denitrification ( $S_{NO3}$ )              |             |             | 1               |                | $-\frac{1}{Y_{PAO}}$ |                 |
| 21                                                                                                  | Aerobic growth of $X_{PAO}$ on $S_A$                                    |             |             | 1               |                |                      |                 |
| 22                                                                                                  | Anoxic growth of $X_{PAO}$ on $S_A$ , denitrification ( $S_{NO2}$ )     |             |             | 1               |                |                      |                 |
| 23                                                                                                  | Anoxic growth of $X_{PAO}$ on $S_A$ , denitrification ( $S_{NO3}$ )     |             |             | 1               |                |                      |                 |
| 24                                                                                                  | Aerobic growth of $X_{PAO}$ on $S_{A,1}$                                |             |             | 1               |                |                      |                 |
| 25                                                                                                  | Anoxic growth of $X_{PAO}$ on $S_{A,1}$ , denitrification ( $S_{NO2}$ ) |             |             | 1               |                |                      |                 |
| 26                                                                                                  | Anoxic growth of $X_{PAO}$ on $S_{A,1}$ , denitrification ( $S_{NO3}$ ) |             |             | 1               |                |                      |                 |
| <b>Hydrolysis processes</b>                                                                         |                                                                         |             |             |                 |                |                      |                 |
| 27                                                                                                  | Anoxic hydrolysis of $X_S$ with nitrite ( $S_{NO2}$ )                   | -1          |             |                 |                |                      |                 |
| 28                                                                                                  | Anoxic hydrolysis of $X_S$ with nitrate ( $S_{NO3}$ )                   | -1          |             |                 |                |                      |                 |
| <b>Activity of the denitrification enzyme for the external carbon source (<math>S_{A,1}</math>)</b> |                                                                         |             |             |                 |                |                      |                 |
| 29                                                                                                  | Enzyme synthesis                                                        |             |             |                 |                |                      | 1               |
| 30                                                                                                  | Enzyme decay                                                            |             |             |                 |                |                      | -1              |

104 **Table S2.** Process rates for the expanded ASM2d (only new and modified processes)

| Process                                                                           |                                                                         | Process rate, $\rho_i$                                                                                                                                                                                                                                                                                                                                    |
|-----------------------------------------------------------------------------------|-------------------------------------------------------------------------|-----------------------------------------------------------------------------------------------------------------------------------------------------------------------------------------------------------------------------------------------------------------------------------------------------------------------------------------------------------|
| <b>Growth of heterotrophic organisms (<math>X_H</math>)</b>                       |                                                                         |                                                                                                                                                                                                                                                                                                                                                           |
| 1                                                                                 | Aerobic growth of $X_H$ on $S_{A,1}$                                    | $\mu_{H1} \cdot \frac{S_{O,H}}{K_{O,H} + S_O} \cdot \frac{S_{A1}}{K_{SA1,H} + S_{A1}} \cdot \frac{S_{NH4,H}}{K_{NH4,H} + S_{NH4}} \cdot \frac{S_{PO4}}{K_{PO4,H} + S_{PO4}} \cdot \frac{S_{ALK}}{K_{ALK,H} + S_{ALK}} \cdot X_H$                                                                                                                          |
| 2                                                                                 | Anoxic growth on $S_F$ , denitrification ( $S_{NO2}$ )                  | $\mu_H \cdot \eta_{NO2,H} \cdot \frac{K_{O,H}}{K_{O,H} + S_O} \cdot \frac{S_F}{K_{SF,H} + S_F} \cdot \frac{S_F}{S_F + S_A} \cdot \frac{S_{NO2}}{K_{NO2,H} + S_{NO2}} \cdot \frac{S_{NH4,H}}{K_{NH4,H} + S_{NH4}} \cdot \frac{S_{PO4}}{K_{PO4,H} + S_{PO4}} \cdot \frac{S_{ALK}}{K_{ALK,H} + S_{ALK}} \cdot X_H \cdot E_{Sat}$                             |
| 3                                                                                 | Anoxic growth on $S_F$ , denitrification ( $S_{NO3}$ )                  | $\mu_H \cdot \eta_{NO3,H} \cdot \frac{K_{O,H}}{K_{O,H} + S_O} \cdot \frac{S_F}{K_{SF,H} + S_F} \cdot \frac{S_F}{S_F + S_A} \cdot \frac{S_{NO3}}{K_{NO3,H} + S_{NO3}} \cdot \frac{S_{NH4,H}}{K_{NH4,H} + S_{NH4}} \cdot \frac{S_{PO4}}{K_{PO4,H} + S_{PO4}} \cdot \frac{S_{ALK}}{K_{ALK,H} + S_{ALK}} \cdot X_H \cdot E_{Sat}$                             |
| 4                                                                                 | Anoxic growth on $S_A$ , denitrification ( $S_{NO2}$ )                  | $\mu_H \cdot \eta_{NO2,H} \cdot \frac{K_{O,H}}{K_{O,H} + S_O} \cdot \frac{S_A}{K_{SA,H} + S_A} \cdot \frac{S_A}{S_F + S_A} \cdot \frac{S_{NO2}}{K_{NO2,H} + S_{NO2}} \cdot \frac{S_{NH4,H}}{K_{NH4,H} + S_{NH4}} \cdot \frac{S_{PO4}}{K_{PO4,H} + S_{PO4}} \cdot \frac{S_{ALK}}{K_{ALK,H} + S_{ALK}} \cdot X_H \cdot E_{Sat}$                             |
| 5                                                                                 | Anoxic growth on $S_A$ , denitrification ( $S_{NO3}$ )                  | $\mu_H \cdot \eta_{NO3,H} \cdot \frac{K_{O,H}}{K_{O,H} + S_O} \cdot \frac{S_A}{K_{SA,H} + S_A} \cdot \frac{S_A}{S_F + S_A} \cdot \frac{S_{NO3}}{K_{NO3,H} + S_{NO3}} \cdot \frac{S_{NH4,H}}{K_{NH4,H} + S_{NH4}} \cdot \frac{S_{PO4}}{K_{PO4,H} + S_{PO4}} \cdot \frac{S_{ALK}}{K_{ALK,H} + S_{ALK}} \cdot X_H \cdot E_{Sat}$                             |
| 6                                                                                 | Anoxic growth on $S_{A1}$ , denitrification ( $S_{NO2}$ )               | $\mu_{H1} \cdot \eta_{NO2,H1} \cdot \frac{K_{O,H}}{K_{O,H} + S_O} \cdot \frac{S_{A1}}{K_{SA1,H} + S_{A1}} \cdot \frac{S_{NO2}}{K_{NO2,H} + S_{NO2}} \cdot \frac{S_{NH4,H}}{K_{NH4,H} + S_{NH4}} \cdot \frac{S_{PO4}}{K_{PO4,H} + S_{PO4}} \cdot \frac{S_{ALK}}{K_{ALK,H} + S_{ALK}} \cdot X_H \cdot E_{Sat}$                                              |
| 7                                                                                 | Anoxic growth on $S_{A1}$ , denitrification ( $S_{NO3}$ )               | $\mu_{H1} \cdot \eta_{NO3,H1} \cdot \frac{K_{O,H}}{K_{O,H} + S_O} \cdot \frac{S_{A1}}{K_{SA1,H} + S_{A1}} \cdot \frac{S_{NO3}}{K_{NO3,H} + S_{NO3}} \cdot \frac{S_{NH4,H}}{K_{NH4,H} + S_{NH4}} \cdot \frac{S_{PO4}}{K_{PO4,H} + S_{PO4}} \cdot \frac{S_{ALK}}{K_{ALK,H} + S_{ALK}} \cdot X_H \cdot E_{Sat}$                                              |
| <b>Activity of Phosphorus Accumulating Organisms (PAO) (<math>X_{PAO}</math>)</b> |                                                                         |                                                                                                                                                                                                                                                                                                                                                           |
| 8                                                                                 | Storage of $X_{PHA}$ by $X_{PAO}$                                       | $q_{PHA} \cdot \frac{S_A}{K_{SA,PAO} + S_A} \cdot \frac{K_{IOPHA}}{K_{IOPHA} + S_O} \cdot \frac{K_{INO2,PAO}}{K_{INO2,PAO} + S_{NO2}} \cdot \frac{S_{ALK}}{K_{ALK,PAO} + S_{ALK}} \cdot \frac{X_{PP}/X_{PAO}}{K_{PP} + X_{PP}/X_{PAO}} \cdot \frac{K_{MAX1} - X_{PHA}/X_{PAO}}{K_{IPHA} + K_{MAX1} - X_{PHA}/X_{PAO}} \cdot X_{PAO}$                      |
| 9                                                                                 | Aerobic storage of $X_{PP}$ by PAO on $X_{PHA}$                         | $q_{PP} \cdot \frac{S_O}{K_{O,PAO} + S_O} \cdot \frac{S_{PO4}}{K_{PO4,PAO} + S_{PO4}} \cdot \frac{S_{ALK}}{K_{ALK,PAO} + S_{ALK}} \cdot \frac{X_{PHA}/X_{PAO}}{K_{PHA} + X_{PHA}/X_{PAO}} \cdot \frac{K_{MAX} - X_{PP}/X_{PAO}}{K_{IPP} + K_{MAX} - X_{PP}/X_{PAO}} \cdot X_{PAO}$                                                                        |
| 10                                                                                | Anoxic storage of $X_{PP}$ on $X_{PHA}$ , denitrification ( $S_{NO2}$ ) | $q_{PP} \cdot \eta_{NO2,PAO} \cdot \frac{K_{O,PAO}}{K_{O,PAO} + S_O} \cdot \frac{S_{NO2}}{K_{NO2,PAO} + S_{NO2}} \cdot \frac{S_{PO4}}{K_{PO4,PAO} + S_{PO4}} \cdot \frac{S_{ALK}}{K_{ALK,PAO} + S_{ALK}} \cdot \frac{X_{PHA}/X_{PAO}}{K_{PHA} + X_{PHA}/X_{PAO}} \cdot \frac{K_{MAX} - X_{PP}/X_{PAO}}{K_{IPP} + K_{MAX} - X_{PP}/X_{PAO}} \cdot X_{PAO}$ |
| 11                                                                                | Anoxic storage of $X_{PP}$ on $X_{PHA}$ , denitrification ( $S_{NO3}$ ) | $q_{PP} \cdot \eta_{NO3,PAO} \cdot \frac{K_{O,PAO}}{K_{O,PAO} + S_O} \cdot \frac{S_{NO3}}{K_{NO3,PAO} + S_{NO3}} \cdot \frac{S_{PO4}}{K_{PO4,PAO} + S_{PO4}} \cdot \frac{S_{ALK}}{K_{ALK,PAO} + S_{ALK}} \cdot \frac{X_{PHA}/X_{PAO}}{K_{PHA} + X_{PHA}/X_{PAO}} \cdot \frac{K_{MAX} - X_{PP}/X_{PAO}}{K_{IPP} + K_{MAX} - X_{PP}/X_{PAO}} \cdot X_{PAO}$ |

| Process |                                                                         | Process rate, $\rho_i$                                                                                                                                                                                                                                                                                                                                  |
|---------|-------------------------------------------------------------------------|---------------------------------------------------------------------------------------------------------------------------------------------------------------------------------------------------------------------------------------------------------------------------------------------------------------------------------------------------------|
| 12      | Aerobic storage of $X_{pp}$ by PAO on $S_A$                             | $q_{PPSA} \cdot \frac{S_O}{K_{O,PAO} + S_O} \cdot \frac{S_A}{K_{SA,PAO} + S_A} \cdot \frac{S_{PO4}}{K_{PO4,PAO} + S_{PO4}} \cdot \frac{S_{ALK}}{K_{ALK,PAO} + S_{ALK}}$ $\cdot \frac{K_{MAX} - X_{PP} / X_{PAO}}{K_{IPP} + K_{MAX} - X_{PP} / X_{PAO}} \cdot X_{PAO}$                                                                                   |
| 13      | Anoxic storage of $X_{pp}$ on $S_{A_2}$ , denitrification ( $S_{NO2}$ ) | $q_{PPSA} \cdot \eta_{NO2,PAOSA} \cdot \frac{K_{O,PAO}}{K_{O,PAO} + S_O} \cdot \frac{S_A}{K_{SA,PAO} + S_A} \cdot \frac{S_{NO2}}{K_{NO2,PAO} + S_{NO2}} \cdot \frac{S_{PO4}}{K_{PO4,PAO} + S_{PO4}}$ $\cdot \frac{S_{ALK}}{K_{ALK,PAO} + S_{ALK}} \cdot \frac{K_{MAX} - X_{PP} / X_{PAO}}{K_{IPP} + K_{MAX} - X_{PP} / X_{PAO}} \cdot X_{PAO}$          |
| 14      | Anoxic storage of $X_{pp}$ on $S_{A_2}$ , denitrification ( $S_{NO3}$ ) | $q_{PPSA} \cdot \eta_{NO3,PAOSA} \cdot \frac{K_{O,PAO}}{K_{O,PAO} + S_O} \cdot \frac{S_A}{K_{SA,PAO} + S_A} \cdot \frac{S_{NO3}}{K_{NO3,PAO} + S_{NO3}} \cdot \frac{S_{PO4}}{K_{PO4,PAO} + S_{PO4}}$ $\cdot \frac{S_{ALK}}{K_{ALK,PAO} + S_{ALK}} \cdot \frac{K_{MAX} - X_{PP} / X_{PAO}}{K_{IPP} + K_{MAX} - X_{PP} / X_{PAO}} \cdot X_{PAO}$          |
| 15      | Aerobic storage of $X_{pp}$ by PAO on $S_{A1}$                          | $q_{PPSA1} \cdot \frac{S_O}{K_{O,PAO} + S_O} \cdot \frac{S_{A1}}{K_{SA1,PAO} + S_{A1}} \cdot \frac{S_{PO4}}{K_{PO4,PAO} + S_{PO4}} \cdot \frac{S_{ALK}}{K_{ALK,PAO} + S_{ALK}}$ $\cdot \frac{K_{MAX} - X_{PP} / X_{PAO}}{K_{IPP} + K_{MAX} - X_{PP} / X_{PAO}} \cdot X_{PAO}$                                                                           |
| 16      | Anoxic storage of $X_{pp}$ on $S_{A1}$ , denitrification ( $S_{NO2}$ )  | $q_{PPSA1} \cdot \eta_{NO2,PAOSA1} \cdot \frac{K_{O,PAO}}{K_{O,PAO} + S_O} \cdot \frac{S_{A1}}{K_{SA1,PAO} + S_{A1}} \cdot \frac{S_{NO2}}{K_{NO2,PAO} + S_{NO2}} \cdot \frac{S_{PO4}}{K_{PO4,PAO} + S_{PO4}}$ $\cdot \frac{S_{ALK}}{K_{ALK,PAO} + S_{ALK}} \cdot \frac{K_{MAX} - X_{PP} / X_{PAO}}{K_{IPP} + K_{MAX} - X_{PP} / X_{PAO}} \cdot X_{PAO}$ |
| 17      | Anoxic storage of $X_{pp}$ on $S_{A1}$ , denitrification ( $S_{NO3}$ )  | $q_{PPSA1} \cdot \eta_{NO3,PAOSA1} \cdot \frac{K_{O,PAO}}{K_{O,PAO} + S_O} \cdot \frac{S_{A1}}{K_{SA1,PAO} + S_{A1}} \cdot \frac{S_{NO3}}{K_{NO3,PAO} + S_{NO3}} \cdot \frac{S_{PO4}}{K_{PO4,PAO} + S_{PO4}}$ $\cdot \frac{S_{ALK}}{K_{ALK,PAO} + S_{ALK}} \cdot \frac{K_{MAX} - X_{PP} / X_{PAO}}{K_{IPP} + K_{MAX} - X_{PP} / X_{PAO}} \cdot X_{PAO}$ |
| 18      | Aerobic growth of $X_{PAO}$ on $X_{PHA}$                                | $\mu_{PAO} \cdot \frac{S_O}{K_{O,PAO} + S_O} \cdot \frac{S_{NH4}}{K_{NH4,PAO} + S_{NH4}} \cdot \frac{S_{PO4}}{K_{PO4,PAO} + S_{PO4}} \cdot \frac{S_{ALK}}{K_{ALK,PAO} + S_{ALK}}$ $\cdot \frac{X_{PHA} / X_{PAO}}{K_{PHA} + X_{PHA} / X_{PAO}} \cdot X_{PAO}$                                                                                           |
| 19      | Anoxic growth of $X_{PAO}$ on $X_{PHA}$ , denitrification ( $S_{NO2}$ ) | $\mu_{PAO} \cdot \eta_{NO2,PAO} \cdot \frac{K_{O,PAO}}{K_{O,PAO} + S_O} \cdot \frac{S_{NO2}}{K_{NO2,PAO} + S_{NO2}} \cdot \frac{S_{NH4}}{K_{NH4,PAO} + S_{NH4}} \cdot \frac{S_{PO4}}{K_{PO4,PAO} + S_{PO4}}$ $\cdot \frac{S_{ALK}}{K_{ALK,PAO} + S_{ALK}} \cdot \frac{X_{PHA} / X_{PAO}}{K_{PHA} + X_{PHA} / X_{PAO}} \cdot X_{PAO}$                    |
| 20      | Anoxic growth of $X_{PAO}$ on $X_{PHA}$ , denitrification ( $S_{NO3}$ ) | $\mu_{PAO} \cdot \eta_{NO3,PAO} \cdot \frac{K_{O,PAO}}{K_{O,PAO} + S_O} \cdot \frac{S_{NO3}}{K_{NO3,PAO} + S_{NO3}} \cdot \frac{S_{NH4}}{K_{NH4,PAO} + S_{NH4}} \cdot \frac{S_{PO4}}{K_{PO4,PAO} + S_{PO4}}$ $\cdot \frac{S_{ALK}}{K_{ALK,PAO} + S_{ALK}} \cdot \frac{X_{PHA} / X_{PAO}}{K_{PHA} + X_{PHA} / X_{PAO}} \cdot X_{PAO}$                    |
| 21      | Aerobic growth of $X_{PAO}$ on $S_A$                                    | $\mu_{PAOSA} \cdot \frac{S_O}{K_{O,PAO} + S_O} \cdot \frac{S_A}{K_{SA,PAO} + S_A} \cdot \frac{S_{NH4}}{K_{NH4,PAO} + S_{NH4}} \cdot \frac{S_{PO4}}{K_{PO4,PAO} + S_{PO4}}$ $\cdot \frac{S_{ALK}}{K_{ALK,PAO} + S_{ALK}} \cdot X_{PAO}$                                                                                                                  |
| 22      | Anoxic growth of $X_{PAO}$ on $S_A$ , denitrification ( $S_{NO2}$ )     | $\mu_{PAOSA} \cdot \eta_{NO2,PAOSA} \cdot \frac{K_{O,PAO}}{K_{O,PAO} + S_O} \cdot \frac{S_A}{K_{SA,PAO} + S_A} \cdot \frac{S_{NO2}}{K_{NO2,PAO} + S_{NO2}} \cdot \frac{S_{NH4}}{K_{NH4,PAO} + S_{NH4}}$ $\cdot \frac{S_{PO4}}{K_{PO4,PAO} + S_{PO4}} \cdot \frac{S_{ALK}}{K_{ALK,PAO} + S_{ALK}} \cdot X_{PAO}$                                         |

| Process                                                                                             |                                                                       | Process rate, $\rho_i$                                                                                                                                                                                                                                                                                                 |
|-----------------------------------------------------------------------------------------------------|-----------------------------------------------------------------------|------------------------------------------------------------------------------------------------------------------------------------------------------------------------------------------------------------------------------------------------------------------------------------------------------------------------|
| 23                                                                                                  | Anoxic growth of $X_{PAO}$ on $S_{A,1}$ denitrification ( $S_{NO3}$ ) | $\mu_{PAOSA} \cdot \eta_{NO3,PAOSA} \cdot \frac{K_{O,PAO}}{K_{O,PAO} + S_O} \cdot \frac{S_A}{K_{SA,PAO} + S_A} \cdot \frac{S_{NO3}}{K_{NO3,PAO} + S_{NO3}} \cdot \frac{S_{NH4}}{K_{NH4,PAO} + S_{NH4}} \cdot \frac{S_{PO4}}{K_{PO4,PAO} + S_{PO4}} \cdot \frac{S_{ALK}}{K_{ALK,PAO} + S_{ALK}} \cdot X_{PAO}$          |
| 24                                                                                                  | Aerobic growth of $X_{PAO}$ on $S_{A,1}$                              | $\mu_{PAOSA1} \cdot \frac{S_O}{K_{O,PAO} + S_O} \cdot \frac{S_{A1}}{K_{SA1,PAO} + S_{A1}} \cdot \frac{S_{NH4}}{K_{NH4,PAO} + S_{NH4}} \cdot \frac{S_{PO4}}{K_{PO4,PAO} + S_{PO4}} \cdot \frac{S_{ALK}}{K_{ALK,PAO} + S_{ALK}} \cdot X_{PAO}$                                                                           |
| 25                                                                                                  | Anoxic growth of $X_{PAO}$ on $S_{A,1}$ denitrification ( $S_{NO2}$ ) | $\mu_{PAOSA1} \cdot \eta_{NO2,PAOSA1} \cdot \frac{K_{O,PAO}}{K_{O,PAO} + S_O} \cdot \frac{S_{A1}}{K_{SA1,PAO} + S_{A1}} \cdot \frac{S_{NO2}}{K_{NO2,PAO} + S_{NO2}} \cdot \frac{S_{NH4}}{K_{NH4,PAO} + S_{NH4}} \cdot \frac{S_{PO4}}{K_{PO4,PAO} + S_{PO4}} \cdot \frac{S_{ALK}}{K_{ALK,PAO} + S_{ALK}} \cdot X_{PAO}$ |
| 26                                                                                                  | Anoxic growth of $X_{PAO}$ on $S_{A,1}$ denitrification ( $S_{NO3}$ ) | $\mu_{PAOSA1} \cdot \eta_{NO3,PAOSA1} \cdot \frac{K_{O,PAO}}{K_{O,PAO} + S_O} \cdot \frac{S_{A1}}{K_{SA1,PAO} + S_{A1}} \cdot \frac{S_{NO3}}{K_{NO3,PAO} + S_{NO3}} \cdot \frac{S_{NH4}}{K_{NH4,PAO} + S_{NH4}} \cdot \frac{S_{PO4}}{K_{PO4,PAO} + S_{PO4}} \cdot \frac{S_{ALK}}{K_{ALK,PAO} + S_{ALK}} \cdot X_{PAO}$ |
| <b>Hydrolysis processes</b>                                                                         |                                                                       |                                                                                                                                                                                                                                                                                                                        |
| 27                                                                                                  | Anoxic hydrolysis of $X_S$ with nitrite ( $S_{NO2}$ )                 | $k_h \cdot \eta_{NO2,HYD} \cdot \frac{K_{O,H}}{K_{O,H} + S_O} \cdot \frac{S_{NO2}}{K_{NO2,HYD} + S_{NO2}} \cdot \frac{X_S / X_H}{K_X + X_S / X_H} \cdot X_H$                                                                                                                                                           |
| 28                                                                                                  | Anoxic hydrolysis of $X_S$ with nitrate ( $S_{NO3}$ )                 | $k_h \cdot \eta_{NO3,HYD} \cdot \frac{K_{O,H}}{K_{O,H} + S_O} \cdot \frac{S_{NO3}}{K_{NO3,HYD} + S_{NO3}} \cdot \frac{X_S / X_H}{K_X + X_S / X_H} \cdot X_H$                                                                                                                                                           |
| <b>Activity of the denitrification enzyme for the external carbon source (<math>S_{A,1}</math>)</b> |                                                                       |                                                                                                                                                                                                                                                                                                                        |
| 29                                                                                                  | Enzyme synthesis                                                      | $k_{S,ENZ} \cdot \left( \frac{S_{NO3}}{K_{NO3,ENZ} + S_{NO3}} \cdot \frac{S_{NO3}}{S_{NO2} + S_{NO3}} + \frac{S_{NO2}}{K_{NO2,ENZ} + S_{NO2}} \cdot \frac{S_{NO2}}{S_{NO2} + S_{NO3}} \right) \cdot \frac{K_{O,ENZ}}{K_{O,ENZ} + S_O} \cdot (1 - E_{Sat})$                                                             |
| 30                                                                                                  | Enzyme decay                                                          | $k_{D,ENZ} \cdot E_{Sat}$                                                                                                                                                                                                                                                                                              |

**Table S3.** List of sensitivity coefficients calculated for the adjusted parameters during the calibration of the extended ASM2d model

| Symbol                                                           | Anaerobic     |                    | Anoxic        |                    |                    |                    | Aerobic       |                    |
|------------------------------------------------------------------|---------------|--------------------|---------------|--------------------|--------------------|--------------------|---------------|--------------------|
|                                                                  | COD           | PO <sub>4</sub> -P | COD           | PO <sub>4</sub> -P | NO <sub>3</sub> -N | NO <sub>2</sub> -N | COD           | PO <sub>4</sub> -P |
| <b>Original kinetic parameters in ASM2d</b>                      |               |                    |               |                    |                    |                    |               |                    |
| <b>Heterotrophic organisms (<math>X_H</math>):</b>               |               |                    |               |                    |                    |                    |               |                    |
| $\mu_H$                                                          | -0.046        | -0.029             | <b>-0.371</b> | -0.160             | <b>-1.062</b>      | <b>-0.466</b>      | <b>-0.304</b> | <b>0.407</b>       |
| <b>Phosphorus Accumulating Organisms (<math>X_{PAO}</math>):</b> |               |                    |               |                    |                    |                    |               |                    |
| $q_{PHA}$                                                        | <b>-0.498</b> | <b>0.510</b>       | -0.092        | 0.217              | <b>0.503</b>       | 0.004              | -0.045        | 0.125              |
| $q_{PP}$                                                         | -0.001        | 0.004              | -0.061        | <b>-0.336</b>      | <b>-0.714</b>      | 0.000              | 0.091         | <b>-1.464</b>      |
| $K_{IPP}$                                                        | 0.003         | -0.026             | 0.017         | <b>0.280</b>       | 0.220              | 0.002              | 0.016         | <b>0.539</b>       |
| $K_{PHA}$                                                        | -0.003        | -0.014             | 0.007         | 0.049              | 0.175              | -0.004             | -0.006        | <b>0.259</b>       |
| <b>Hydrolysis of particulate substrate (<math>X_S</math>):</b>   |               |                    |               |                    |                    |                    |               |                    |
| $K_h$                                                            | 0.082         | 0.061              | 0.217         | 0.213              | <b>-0.882</b>      | -0.080             | 0.103         | 0.039              |

| Symbol                                                                  | Anaerobic     |                    | Anoxic        |                    |                    |                    | Aerobic       |                    |
|-------------------------------------------------------------------------|---------------|--------------------|---------------|--------------------|--------------------|--------------------|---------------|--------------------|
|                                                                         | COD           | PO <sub>4</sub> -P | COD           | PO <sub>4</sub> -P | NO <sub>3</sub> -N | NO <sub>2</sub> -N | COD           | PO <sub>4</sub> -P |
| $\eta_{\text{Fe}}$                                                      | <b>0.270</b>  | 0.220              | 0.008         | 0.078              | -0.033             | -0.005             | 0.005         | 0.062              |
| $K_X$                                                                   | 0.142         | 0.237              | -0.062        | -0.075             | <b>0.380</b>       | 0.037              | -0.034        | -0.005             |
| <b>New kinetic parameters in expanded ASM2d</b>                         |               |                    |               |                    |                    |                    |               |                    |
| <b>Heterotrophic organisms (<math>X_H</math>):</b>                      |               |                    |               |                    |                    |                    |               |                    |
| $\mu_{H1}$                                                              | -0.025        | 0.016              | -0.061        | 0.018              | 0.123              | -0.118             | <b>-0.520</b> | <b>1.072</b>       |
| $\eta_{\text{NO}_2,H}$                                                  | -0.001        | 0.000              | <b>-0.332</b> | 0.035              | 0.094              | <b>-0.462</b>      | 0.000         | 0.001              |
| $\eta_{\text{NO}_3,H}$                                                  | -0.042        | -0.030             | <b>-0.371</b> | -0.158             | <b>-1.064</b>      | -0.002             | 0.012         | -0.024             |
| $\eta_{\text{NO}_2,H1}$                                                 | -0.001        | 0.000              | -0.053        | 0.009              | 0.000              | -0.193             | 0.012         | -0.015             |
| $\eta_{\text{NO}_3,H1}$                                                 | -0.001        | 0.000              | -0.061        | 0.018              | -0.111             | 0.008              | 0.011         | -0.014             |
| $K_{\text{SA},H}$                                                       | 0.001         | 0.001              | 0.014         | 0.020              | 0.080              | 0.025              | 0.012         | -0.036             |
| $K_{\text{SA1},H}$                                                      | -0.001        | 0.000              | 0.008         | -0.002             | 0.012              | 0.013              | 0.012         | -0.010             |
| $K_{\text{NO}_2,H}$                                                     | 0.001         | 0.000              | 0.000         | 0.001              | -0.002             | 0.013              | -0.011        | 0.014              |
| $K_{\text{NO}_3,H}$                                                     | 0.020         | 0.015              | 0.008         | 0.040              | <b>0.604</b>       | 0.012              | 0.010         | -0.010             |
| <b>Phosphorus Accumulating Organisms (<math>X_{\text{PAO}}</math>):</b> |               |                    |               |                    |                    |                    |               |                    |
| $q_{\text{PPSA}}$                                                       | -0.001        | 0.008              | -0.016        | -0.058             | -0.140             | -0.001             | -0.008        | <b>-0.263</b>      |
| $q_{\text{PPSA1}}$                                                      | 0.000         | 0.000              | -0.006        | -0.122             | -0.019             | 0.008              | 0.013         | <b>-0.851</b>      |
| $\mu_{\text{PAOSA}}$                                                    | 0.009         | -0.001             | -0.018        | -0.068             | -0.188             | -0.001             | -0.074        | <b>-0.286</b>      |
| $\mu_{\text{PAOSA1}}$                                                   | -0.013        | 0.008              | -0.009        | -0.135             | -0.093             | -0.093             | <b>-1.156</b> | <b>-0.434</b>      |
| $\eta_{\text{NO}_2,\text{PAO}}$                                         | 0.001         | 0.001              | 0.000         | -0.227             | 0.000              | 0.109              | -0.011        | 0.014              |
| $\eta_{\text{NO}_3,\text{PAO}}$                                         | 0.005         | 0.009              | -0.044        | -0.133             | <b>-0.481</b>      | 0.000              | 0.001         | 0.002              |
| $\eta_{\text{NO}_2,\text{PAOSA}}$                                       | 0.000         | 0.001              | -0.090        | -0.192             | 0.000              | 0.202              | 0.000         | 0.000              |
| $\eta_{\text{NO}_3,\text{PAOSA}}$                                       | -0.005        | 0.021              | -0.053        | -0.134             | <b>-0.463</b>      | 0.000              | -0.003        | -0.006             |
| $\eta_{\text{NO}_2,\text{PAOSA1}}$                                      | 0.000         | 0.001              | -0.105        | -0.198             | 0.000              | 0.113              | 0.000         | 0.000              |
| $\eta_{\text{NO}_3,\text{PAOSA1}}$                                      | -0.022        | 0.045              | -0.092        | -0.149             | -0.144             | 0.008              | -0.031        | 0.025              |
| $K_{\text{SA},\text{PAO}}$                                              | 0.044         | -0.035             | 0.027         | -0.020             | 0.026              | 0.037              | 0.007         | 0.031              |
| $K_{\text{SA1},\text{PAO}}$                                             | 0.002         | -0.001             | 0.001         | 0.004              | 0.005              | 0.000              | 0.033         | 0.136              |
| $K_{\text{NO}_2,\text{PAO}}$                                            | -0.001        | 0.001              | -0.124        | 0.191              | 0.000              | 0.000              | 0.002         | -0.001             |
| $K_{\text{NO}_3,\text{PAO}}$                                            | 0.001         | -0.015             | 0.007         | 0.024              | <b>0.270</b>       | 0.000              | 0.000         | 0.002              |
| $K_{\text{O},\text{PAO}}$                                               | -0.001        | 0.002              | 0.000         | 0.000              | 0.000              | 0.000              | -0.022        | 0.373              |
| $K_{\text{IPHA}}$                                                       | 0.000         | 0.000              | -0.012        | 0.000              | -0.013             | 0.000              | 0.000         | <b>0.610</b>       |
| $K_{\text{IOPHA}}$                                                      | 0.000         | 0.000              | 0.000         | 0.000              | 0.000              | 0.000              | 0.000         | <b>-0.525</b>      |
| $K_{\text{max1}}$                                                       | 0.000         | 0.000              | 0.006         | 0.049              | 0.053              | 0.000              | <b>-0.629</b> | <b>1.073</b>       |
| <b>Hydrolysis of particulate substrate (<math>X_S</math>):</b>          |               |                    |               |                    |                    |                    |               |                    |
| $\eta_{\text{NO}_2,\text{HYD}}$                                         | 0.001         | 0.001              | 0.192         | 0.018              | -0.003             | -0.075             | 0.000         | 0.000              |
| $\eta_{\text{NO}_3,\text{HYD}}$                                         | 0.018         | 0.015              | 0.029         | 0.093              | <b>-0.843</b>      | 0.008              | 0.012         | -0.005             |
| $K_{\text{NO}_2,\text{HYD}}$                                            | -0.001        | -0.001             | -0.005        | -0.002             | 0.003              | 0.001              | -0.012        | 0.016              |
| $K_{\text{NO}_3,\text{HYD}}$                                            | -0.014        | -0.009             | -0.012        | -0.011             | 0.204              | 0.000              | 0.002         | -0.008             |
| <b>Denitrification enzymes</b>                                          |               |                    |               |                    |                    |                    |               |                    |
| $k_{\text{S},\text{ENZ}}$                                               | -             | -                  | -0.032        | -0.004             | -0.082             | -0.054             | -             | -                  |
| $k_{\text{D},\text{ENZ}}$                                               | -             | -                  | 0.000         | 0.000              | 0.002              | 0.000              | -             | -                  |
| $K_{\text{NO}_2,\text{ENZ}}$                                            | -             | -                  | 0.000         | 0.000              | 0.000              | 0.000              | -             | -                  |
| $K_{\text{NO}_3,\text{ENZ}}$                                            | -             | -                  | 0.000         | 0.000              | 0.000              | 0.000              | -             | -                  |
| $K_{\text{O},\text{ENZ}}$                                               | -             | -                  | 0.000         | 0.000              | 0.000              | 0.000              | -             | -                  |
| <b>Original stoichiometric parameters in ASM2d</b>                      |               |                    |               |                    |                    |                    |               |                    |
| <b>Heterotrophic organisms (<math>X_H</math>):</b>                      |               |                    |               |                    |                    |                    |               |                    |
| $Y_H$                                                                   | <b>-0.529</b> | <b>-0.411</b>      | <b>0.728</b>  | <b>-0.663</b>      | <b>1.910</b>       | <b>3.974</b>       | 0.076         | <b>-0.993</b>      |
| <b>Phosphorus Accumulating Organisms (<math>X_{\text{PAO}}</math>):</b> |               |                    |               |                    |                    |                    |               |                    |
| $Y_{\text{PO}_4}$                                                       | 0.008         | <b>0.963</b>       | -0.009        | <b>0.820</b>       | <b>-0.266</b>      | 0.008              | -0.016        | <b>1.895</b>       |
| <b>New stoichiometric parameters in expanded ASM2d</b>                  |               |                    |               |                    |                    |                    |               |                    |
| <b>Heterotrophic organisms (<math>X_H</math>):</b>                      |               |                    |               |                    |                    |                    |               |                    |
| $Y_{H1}$                                                                | 0.001         | 0.000              | 0.065         | -0.051             | <b>0.684</b>       | <b>0.560</b>       | -0.002        | 0.002              |
| <b>Phosphorus Accumulating Organisms (<math>X_{\text{PAO}}</math>):</b> |               |                    |               |                    |                    |                    |               |                    |
| $Y_{\text{PAOSA}}$                                                      | 0.024         | -0.101             | 0.046         | -0.073             | <b>0.669</b>       | -0.001             | 0.011         | <b>-0.258</b>      |

| Symbol              | Anaerobic |                    | Anoxic |                    |                    |                    | Aerobic      |                    |
|---------------------|-----------|--------------------|--------|--------------------|--------------------|--------------------|--------------|--------------------|
|                     | COD       | PO <sub>4</sub> -P | COD    | PO <sub>4</sub> -P | NO <sub>3</sub> -N | NO <sub>2</sub> -N | COD          | PO <sub>4</sub> -P |
| Y <sub>PAOSA1</sub> | 0.002     | -0.015             | 0.079  | -0.060             | <b>0.878</b>       | -0.010             | <b>0.730</b> | -0.198             |
| Y <sub>SA1</sub>    | 0.000     | 0.000              | -0.008 | 0.008              | -0.085             | 0.000              | -0.023       | 0.000              |

108

109 **Table S4.** Calibration/validation procedure for the expanded ASM2d based on results of the  
110 batch tests, list of the adjusted parameters, and evaluation of simulation results against  
111 experimental data

| Batch Test                        | Electron Acceptor  | External Carbon    | Target Variable    | Standard Error |          | R <sup>2</sup> | Adjusted parameters                                                                                                             |
|-----------------------------------|--------------------|--------------------|--------------------|----------------|----------|----------------|---------------------------------------------------------------------------------------------------------------------------------|
|                                   |                    |                    |                    | Relative       | Absolute |                |                                                                                                                                 |
| Model calibration                 |                    |                    |                    |                |          |                |                                                                                                                                 |
| Step 3.1                          |                    |                    |                    |                |          |                |                                                                                                                                 |
| 2 phase                           | DO                 | acetate            | OUR                | 0.054          | 0.130    | 0.838          | Y <sub>H</sub><br><br>K <sub>I,PP</sub> , K <sub>PHA</sub> ,<br>K <sub>IO,PHA</sub> ,<br>K <sub>I,PHA</sub> , K <sub>maxI</sub> |
|                                   |                    |                    | COD                | 0.003          | 0.172    | 0.906          |                                                                                                                                 |
|                                   |                    |                    | PO <sub>4</sub> -P | 0.108          | 0.132    | 0.967          |                                                                                                                                 |
| Step 3.2                          |                    |                    |                    |                |          |                |                                                                                                                                 |
| 2 phase                           | DO                 | ethanol            | OUR                | 0.153          | 0.163    | 0.925          | Y <sub>H1</sub>                                                                                                                 |
|                                   |                    |                    | COD                | 0.147          | 0.202    | 0.934          | μ <sub>H1</sub>                                                                                                                 |
|                                   |                    |                    | PO <sub>4</sub> -P | 0.199          | 0.243    | 0.987          | q <sub>PPSA1</sub>                                                                                                              |
| Step 3.3                          |                    |                    |                    |                |          |                |                                                                                                                                 |
| 2 phase                           | NO <sub>3</sub> -N | no external carbon | NO <sub>3</sub> -N | 0.007          | 0.022    | 0.993          | η <sub>NO3,H</sub>                                                                                                              |
|                                   | NO <sub>2</sub> -N |                    | NO <sub>2</sub> -N | 0.015          | 0.032    | 0.965          | η <sub>NO2,H</sub>                                                                                                              |
| Step 3.4                          |                    |                    |                    |                |          |                |                                                                                                                                 |
| 2 phase                           | NO <sub>3</sub> -N | ethanol            | NO <sub>3</sub> -N | 0.035          | 0.088    | 0.997          | η <sub>NO3,H1</sub>                                                                                                             |
|                                   | NO <sub>2</sub> -N |                    | NO <sub>2</sub> -N | 0.012          | 0.049    | 0.967          | η <sub>NO2,H1</sub>                                                                                                             |
| Model validation with other tests |                    |                    |                    |                |          |                |                                                                                                                                 |
| Step 5                            |                    |                    |                    |                |          |                |                                                                                                                                 |
| 1 phase                           | DO                 | acetate            | OUR                | 0.104          | 0.146    | 0.925          |                                                                                                                                 |
|                                   |                    |                    | COD                | 0.056          | 0.086    | 0.972          |                                                                                                                                 |
|                                   |                    |                    | PO <sub>4</sub> -P | 0.004          | 0.038    | 0.995          |                                                                                                                                 |
| 1 phase                           | DO                 | ethanol            | OUR                | 0.0029         | 0.116    | 0.936          |                                                                                                                                 |
|                                   |                    |                    | COD                | 0.0156         | 0.036    | 0.984          |                                                                                                                                 |
|                                   |                    |                    | PO <sub>4</sub> -P | 0.120          | 0.315    | 0.978          |                                                                                                                                 |
| 2 phase                           | NO <sub>3</sub> -N | no external carbon | COD                | 0.025          | 0.096    | 0.952          |                                                                                                                                 |
|                                   |                    |                    | PO <sub>4</sub> -P | 0.142          | 0.155    | 0.972          |                                                                                                                                 |
| 2 phase                           | NO <sub>2</sub> -N | no external carbon | COD                | 0.026          | 0.113    | 0.958          |                                                                                                                                 |
|                                   |                    |                    | PO <sub>4</sub> -P | 0.222          | 0.255    | 0.897          |                                                                                                                                 |
| 1 phase                           | NO <sub>3</sub> -N | acetate            | COD                | 0.011          | 0.092    | 0.848          |                                                                                                                                 |
|                                   |                    |                    | NO <sub>2</sub> -N | 0.047          | 0.085    | 0.888          |                                                                                                                                 |
|                                   |                    |                    | NO <sub>3</sub> -N | 0.178          | 0.304    | 0.792          |                                                                                                                                 |
|                                   |                    |                    | PO <sub>4</sub> -P | 0.228          | 0.245    | 0.810          |                                                                                                                                 |

|                    |                    |         |                    |        |       |       |
|--------------------|--------------------|---------|--------------------|--------|-------|-------|
| <b>1<br/>phase</b> | NO <sub>2</sub> -N | acetate | COD                | 0.142  | 0.142 | 0.965 |
|                    |                    |         | NO <sub>3</sub> -N | 0.087  | 0.090 | 0.988 |
|                    |                    |         | PO <sub>4</sub> -P | 0.089  | 0.013 | 0.942 |
| <b>2<br/>phase</b> | NO <sub>3</sub> -N | ethanol | COD                | 0.036  | 0.091 | 0.966 |
|                    |                    |         | PO <sub>4</sub> -P | 0.007  | 0.082 | 0.952 |
| <b>2<br/>phase</b> | NO <sub>2</sub> -N | ethanol | COD                | 0.0125 | 0.109 | 0.972 |
|                    |                    |         | PO <sub>4</sub> -P | 0.035  | 0.079 | 0.957 |
| <b>2<br/>phase</b> | NO <sub>3</sub> -N | acetate | COD                | 0.071  | 0.144 | 0.895 |
|                    |                    |         | NO <sub>3</sub> -N | 0.279  | 0.279 | 0.883 |
|                    |                    |         | PO <sub>4</sub> -P | 0.061  | 0.092 | 0.922 |
| <b>2<br/>phase</b> | NO <sub>2</sub> -N | acetate | COD                | 0.052  | 0.006 | 0.960 |
|                    |                    |         | NO <sub>2</sub> -N | 0.024  | 0.097 | 0.892 |
|                    |                    |         | PO <sub>4</sub> -P | 0.091  | 0.136 | 0.862 |
| <b>1<br/>phase</b> | NO <sub>3</sub> -N | ethanol | COD                | 0.063  | 0.068 | 0.862 |
|                    |                    |         | NO <sub>3</sub> -N | 0.062  | 0.064 | 0.884 |
|                    |                    |         | PO <sub>4</sub> -P | 0.011  | 0.083 | 0.956 |
| <b>1<br/>phase</b> | NO <sub>2</sub> -N | ethanol | COD                | 0.091  | 0.112 | 0.873 |
|                    |                    |         | NO <sub>2</sub> -N | 0.056  | 0.098 | 0.948 |
|                    |                    |         | PO <sub>4</sub> -P | 0.029  | 0.064 | 0.943 |

112

113 **Table S5.** Kinetic and stoichiometric parameters adjusted in the ASM2d and new parameters

114 in the expanded ASM2d

| Symbol                                           | Definition                                      | Unit        | Defaulted value | Calibrated value         |            |                          |
|--------------------------------------------------|-------------------------------------------------|-------------|-----------------|--------------------------|------------|--------------------------|
|                                                  |                                                 |             |                 | Swiniarski et al. (2012) | This study | 95% confidence intervals |
| Kinetic parameters in the original ASM2d         |                                                 |             |                 |                          |            |                          |
| Heterotrophic organisms ( $X_H$ ):               |                                                 |             |                 |                          |            |                          |
| $\mu_H$                                          | Maximum growth rate of $X_H$ on $S_A$ and $S_F$ | 1/d         | 6.00            | 3.00                     | 3.00       |                          |
| Phosphorus Accumulating Organisms ( $X_{PAO}$ ): |                                                 |             |                 |                          |            |                          |
| $q_{PHA}$                                        | Rate constant for storage of $X_{PHA}$          | 1/d         | 3.00            | 6.00                     | 6.00       |                          |
| $q_{PP}$                                         | Rate constant for storage of $X_{PP}$           | 1/d         | 1.50            | 4.50                     | 4.50       |                          |
| $K_{IPP}$                                        | Inhibition coefficient for $X_{PP}$ storage     | g P/g COD   | 0.02            | 0.10                     | 0.13       | $\pm 0.114$              |
| $K_{PHA}$                                        | Saturation coefficient for $X_{PHA}$            | g COD/g COD | 0.01            | 0.15                     | 0.10       | $\pm 0.029$              |
| Hydrolysis of particulate substrate ( $X_S$ ):   |                                                 |             |                 |                          |            |                          |
| $k_h$                                            | Hydrolysis rate constant                        | 1/d         | 3.00            | 2.50                     | 2.50       |                          |
| $\eta_{fe}$                                      | Anaerobic hydrolysis reduction factor           | -           | 0.40            | 0.10                     | 0.10       |                          |
| $K_X$                                            | Saturation coefficient for particulate COD      | g COD/g COD | 0.10            | 0.20                     | 0.20       |                          |
| New kinetic parameters in the expanded ASM2d     |                                                 |             |                 |                          |            |                          |
| Heterotrophic organisms ( $X_H$ ):               |                                                 |             |                 |                          |            |                          |
| $\mu_{H1}$                                       | Maximum growth rate of $X_H$ on $S_{A,1}$       | 1/d         |                 | 0.40                     | 0.26       | $\pm 0.042$              |

| Symbol                                                           | Definition                                                                        | Unit                    | Defaulted value | Calibrated value         |            |                          |
|------------------------------------------------------------------|-----------------------------------------------------------------------------------|-------------------------|-----------------|--------------------------|------------|--------------------------|
|                                                                  |                                                                                   |                         |                 | Swiniarski et al. (2012) | This study | 95% confidence intervals |
| $\eta_{NO2,H}$                                                   | Reduction factor for denitrification ( $S_{NO2}$ )                                | -                       |                 |                          | 0.32       | $\pm 0.054$              |
| $\eta_{NO3,H}$                                                   | Reduction factor for denitrification ( $S_{NO3}$ )                                | -                       | 0.80            | 0.80                     | 0.35       | $\pm 0.138$              |
| $\eta_{NO2,H1}$                                                  | Reduction factor on $S_{A,1}$ for denitrification ( $S_{NO2}$ )                   | -                       |                 |                          | 0.06       | $\pm 0.028$              |
| $\eta_{NO3,H1}$                                                  | Reduction factor on $S_{A,1}$ for denitrification ( $S_{NO3}$ )                   | -                       |                 | 0.80                     | 0.21       | $\pm 0.029$              |
| $K_{SA1,H}$                                                      | Saturation coefficient for growth of $X_H$ on $S_{A,1}$                           | $\frac{g}{COD/m^3}$     |                 | 4.00                     | 4.00       |                          |
| $K_{NO2,H}$                                                      | Saturation coefficient for growth of $X_H$ ( $S_{NO2}$ )                          | $g\ N/m^3$              |                 |                          | 0.50       |                          |
| <b>Phosphorus Accumulating Organisms (<math>X_{PAO}</math>):</b> |                                                                                   |                         |                 |                          |            |                          |
| $q_{PPSA}$                                                       | Rate constant for storage of $X_{PP}$ on $S_A$                                    | 1/d                     |                 | 1.00                     | 1.00       |                          |
| $q_{PPSA1}$                                                      | Rate constant for storage of $X_{PP}$ on $S_{A,1}$                                | 1/d                     |                 | 4.50                     | 5.00       | $\pm 1.115$              |
| $\mu_{PAOSA}$                                                    | Maximum growth rate of $X_{PAO}$ on $S_A$                                         | 1/d                     |                 | 1.00                     | 1.00       |                          |
| $\mu_{PAOSA1}$                                                   | Maximum growth rate of $X_{PAO}$ on $S_{A,1}$                                     | 1/d                     |                 | 1.00                     | 1.00       |                          |
| $\eta_{NO2,PAOSA}$                                               | Reduction factor for anoxic activity on $S_A$ ( $S_{NO2}$ )                       | -                       |                 |                          | 0.00       |                          |
| $\eta_{NO3,PAOSA}$                                               | Reduction factor for anoxic activity on $S_A$ ( $S_{NO3}$ )                       | -                       |                 | 0.60                     | 0.60       |                          |
| $\eta_{NO2,PAOSA1}$                                              | Reduction factor for anoxic activity on $S_{A,1}$ ( $S_{NO2}$ )                   | -                       |                 |                          | 0.00       |                          |
| $\eta_{NO3,PAOSA1}$                                              | Reduction factor for anoxic activity on $S_{A,1}$ ( $S_{NO3}$ )                   | -                       |                 | 0.60                     | 0.60       |                          |
| $K_{SA,PAO}$                                                     | Saturation coefficient for storage of $X_{PP}$ and $X_{PAO}$ growth on $S_A$      | $\frac{g}{COD/m^3}$     |                 | 4.00                     | 4.00       |                          |
| $K_{SA1,PAO}$                                                    | Saturation coefficient for storage of $X_{PP}$ and $X_{PAO}$ growth on $S_{A,1}$  | $\frac{g}{COD/m^3}$     |                 | 4.00                     | 4.00       |                          |
| $K_{NO2,PAO}$                                                    | Saturation coefficient for storage of $X_{PP}$ and $X_{PAO}$ growth ( $S_{NO2}$ ) | $g\ N/m^3$              |                 |                          | 3.00       |                          |
| $K_{O,PAO}$                                                      | Saturation coefficient for oxygen for storage of $X_{PP}$ and $X_{PAO}$ growth    | $g\ O_2/m^3$            |                 | 0.20                     | 0.20       |                          |
| $K_{IOPHA}$                                                      | Inhibition coefficient for $X_{PHA}$                                              | $g\ O_2/m^3$            |                 |                          | 3.60       | $\pm 1.135$              |
| $K_{MAX1}$                                                       | Maximum ratio of $X_{PHA}/X_{PAO}$                                                | $\frac{g\ COD}{g\ COD}$ |                 |                          | 0.34       | $\pm 0.126$              |
| $K_{IPHA}$                                                       | $X_{PHA}$ storage inhibition coefficient                                          | $\frac{g\ COD}{g\ COD}$ |                 |                          | 0.02       | $\pm 0.138$              |
| <b>Hydrolysis of particulate substrate (<math>X_S</math>):</b>   |                                                                                   |                         |                 |                          |            |                          |
| $\eta_{NO2,HYD}$                                                 | Anoxic hydrolysis reduction factor ( $S_{NO2}$ )                                  | -                       |                 |                          | 0.6        |                          |
| $K_{NO2,HYD}$                                                    | Saturation coefficient for hydrolysis ( $S_{NO2}$ )                               | $g\ N/m^3$              |                 |                          | 0.5        |                          |
| <b>Denitrification enzymes</b>                                   |                                                                                   |                         |                 |                          |            |                          |
| $k_{S,ENZ}$                                                      | Synthesis rate constant for denitrification enzymes                               | 1/d                     |                 |                          | 30.00      |                          |



| Symbol                                                           | Definition                                                      | Unit                             | Defaulted value | Calibrated value         |            |                          |
|------------------------------------------------------------------|-----------------------------------------------------------------|----------------------------------|-----------------|--------------------------|------------|--------------------------|
|                                                                  |                                                                 |                                  |                 | Swiniarski et al. (2012) | This study | 95% confidence intervals |
| $k_{D,ENZ}$                                                      | Decay rate constant for denitrification enzymes                 | 1/d                              |                 |                          | 4.00       |                          |
| $K_{NO2,ENZ}$                                                    | Nitrite half saturation coefficient for denitrification enzymes | g N/m <sup>3</sup>               |                 |                          | 0.50       |                          |
| $K_{NO3,ENZ}$                                                    | Nitrate half saturation coefficient for denitrification enzymes | g N/m <sup>3</sup>               |                 |                          | 0.50       |                          |
| $K_{O,ENZ}$                                                      | Oxygen half saturation coefficient for denitrification enzymes  | g O <sub>2</sub> /m <sup>3</sup> |                 |                          | 0.10       |                          |
| <b>Stoichiometric parameters in the original ASM2d</b>           |                                                                 |                                  |                 |                          |            |                          |
| <i>Heterotrophic organisms (<math>X_H</math>):</i>               |                                                                 |                                  |                 |                          |            |                          |
| $Y_H$                                                            | Yield coefficient for $S_A$                                     | g COD/g COD                      | 0.63            | 0.67                     | 0.82       | ±0.016                   |
| <i>Phosphorus Accumulating Organisms (<math>X_{PAO}</math>):</i> |                                                                 |                                  |                 |                          |            |                          |
| $Y_{PO4}$                                                        | $X_{PP}$ requirement per $X_{PHA}$ stored ( $S_{PO4}$ release)  | g P/g COD                        | 0.40            | 0.34                     | 0.40       |                          |
| <b>New stoichiometric parameters in the expanded ASM2d</b>       |                                                                 |                                  |                 |                          |            |                          |
| <i>Heterotrophic organisms (<math>X_H</math>):</i>               |                                                                 |                                  |                 |                          |            |                          |
| $Y_{H1}$                                                         | Yield coefficient of $X_H$ for $S_{A,1}$                        | g COD/g COD                      |                 | 0.70                     | 0.43       | ±0.049                   |
| <i>Phosphorus Accumulating Organisms (<math>X_{PAO}</math>):</i> |                                                                 |                                  |                 |                          |            |                          |
| $Y_{PAOSA}$                                                      | Yield coefficient of $X_{PAO}$ for $S_A$                        | g COD/g COD                      |                 | 0.625                    | 0.625      |                          |
| $Y_{PAOSA1}$                                                     | Yield coefficient of $X_{PAO}$ for $S_{A,1}$                    | g COD/g COD                      |                 | 0.625                    | 0.625      |                          |
| $Y_{SA1}$                                                        | $S_{A,1}$ requirement for storage of $X_{PP}$                   | g COD/g P                        |                 | 0.20                     | 0.20       |                          |

**Table S6.** Approximate correlation matrix of parameter estimates using experimental data for step 3.1 of model calibration

|          | Parameter   | Unit                             | Correlation matrix |            |           |            |           |             |
|----------|-------------|----------------------------------|--------------------|------------|-----------|------------|-----------|-------------|
|          |             |                                  | $Y_H$              | $K_{MAX1}$ | $K_{IPP}$ | $K_{IPHA}$ | $K_{PHA}$ | $K_{IOPHA}$ |
| Step 3.1 | $Y_H$       | g COD/g COD                      | 1.00               |            |           |            |           |             |
|          | $K_{MAX1}$  | g P/ g COD                       | 0.05               | 1.00       |           |            |           |             |
|          | $K_{IPP}$   | g P/g COD                        | -0.70              | 0.11       | 1.00      |            |           |             |
|          | $K_{IPHA}$  | g P/g COD                        | 0.12               | 0.98       | 0.08      | 1.00       |           |             |
|          | $K_{PHA}$   | g COD/g COD                      | -0.58              | -0.10      | 0.13      | -0.16      | 1.00      |             |
|          | $K_{IOPHA}$ | g O <sub>2</sub> /m <sup>3</sup> | 0.34               | -0.55      | -0.55     | -0.54      | -0.07     | 1.00        |

119 **Table S7.** Approximate correlation matrix of parameter estimates using experimental data for  
120 steps 3.2-3.4 of model calibration

|          | Parameter       | Unit            | Correlation matrix |            |              |                |                |                 |                 |
|----------|-----------------|-----------------|--------------------|------------|--------------|----------------|----------------|-----------------|-----------------|
|          |                 |                 | $Y_{HI}$           | $\mu_{HI}$ | $q_{PP,SA1}$ | $\eta_{NO3,H}$ | $\eta_{NO2,H}$ | $\eta_{NO3,HI}$ | $\eta_{NO2,HI}$ |
| Step 3.2 | $Y_{HI}$        | g COD/<br>g COD | 1.00               |            |              |                |                |                 |                 |
|          | $\mu_{HI}$      | 1/d             | 0.96               | 1.00       |              |                |                |                 |                 |
|          | $q_{PP,SA1}$    | 1/d             | -0.02              | 0.01       | 1.00         |                |                |                 |                 |
| Step 3.3 | $\eta_{NO3,H}$  | -               |                    |            |              | 1              |                |                 |                 |
|          | $\eta_{NO2,H}$  | -               |                    |            |              | -0.51          | 1              |                 |                 |
| Step 3.4 | $\eta_{NO3,HI}$ | -               |                    |            |              |                |                | 1               |                 |
|          | $\eta_{NO2,HI}$ | -               |                    |            |              |                |                | -0.62           | 1               |

121
